# Supplementary material
Source: PubMed Central journal article supplement (PMC7270342)
Supplement: mmc1.pdf [file mmc1.pdf]

# THE LANCET

## Infectious Diseases

### **Supplementary appendix**

This appendix formed part of the original submission and has been peer reviewed.  
We post it as supplied by the authors.

Supplement to: Baud D, Nielsen-Saines K, Qi X, Musso D, Pomar L, Favre G. Authors' reply. *Lancet Infect Dis* 2020; published online March 31.  
[https://doi.org/10.1016/S1473-3099\(20\)30255-3](https://doi.org/10.1016/S1473-3099(20)30255-3).

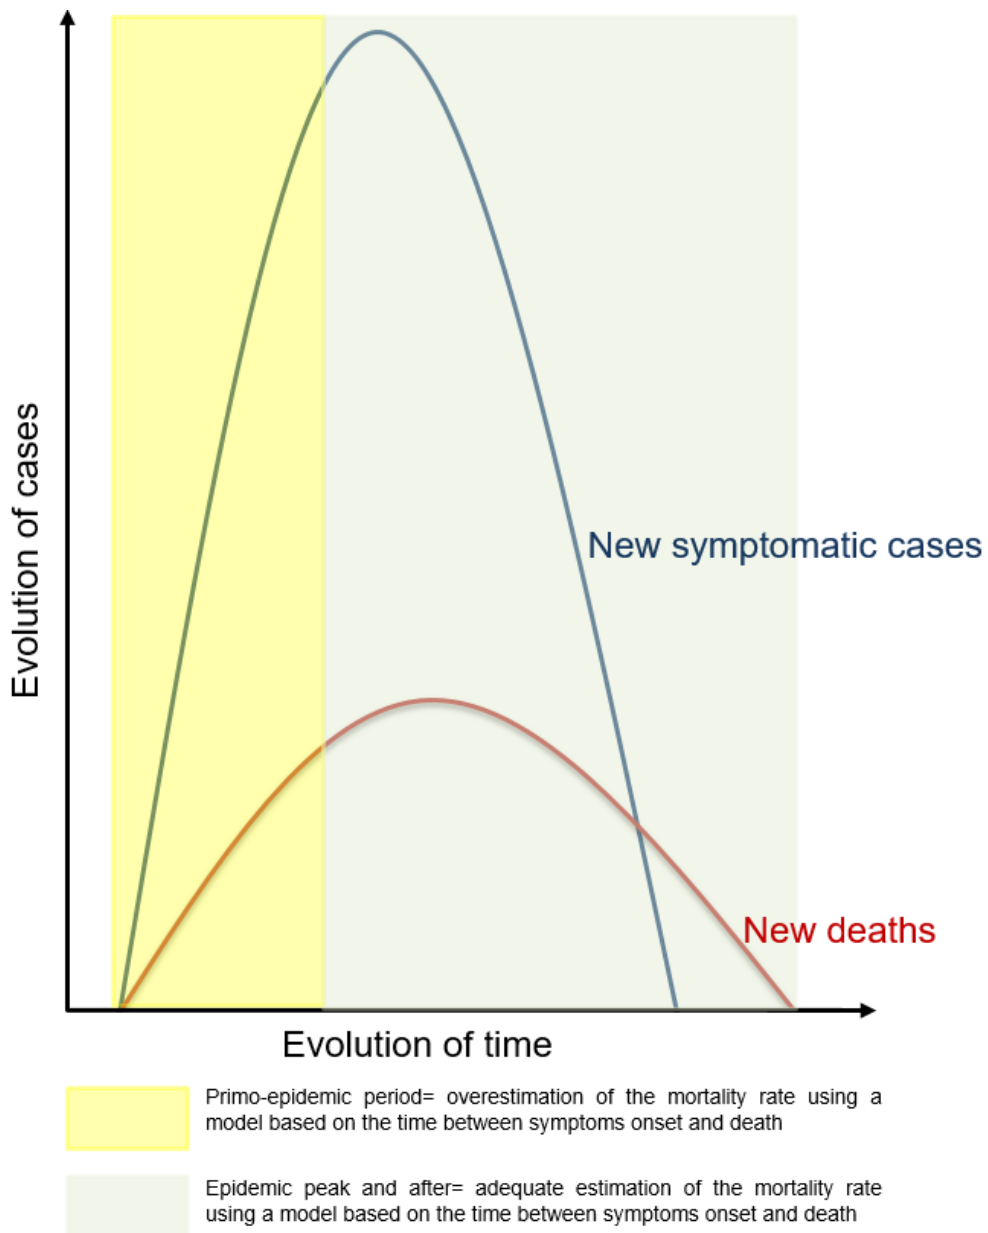

**Figure:** Estimation of fatality rates using a model based on the time between symptoms onset and death, following epidemic stages
